# Supplementary material for: Application of the Key Characteristics of Carcinogens to Per and Polyfluoroalkyl Substances
Source: PubMed Central journal article supplement (PMC7084585; doi:10.3390/ijerph17051668), 2020-03-04
Supplement: ijerph-17-01668-s001.pdf [file ijerph-17-01668-s001.pdf]

**Table S1.** List of abbreviations for reviewed PFAS and data availability for key characteristics.

| Abbreviation            | Chemical Name                               | PFAS Type                        | Chemical Formula                                                                          | CAS Number | Key characteristics of carcinogens (1-10) assessed for individual PFAS in different types of studies |                   |                      |
|-------------------------|---------------------------------------------|----------------------------------|-------------------------------------------------------------------------------------------|------------|------------------------------------------------------------------------------------------------------|-------------------|----------------------|
|                         |                                             |                                  |                                                                                           |            | Epidemiological                                                                                      | Animal Bioassay   | In vitro             |
| <b>PFOA</b>             |                                             |                                  |                                                                                           |            |                                                                                                      |                   |                      |
| PFOA                    | Perfluorooctanoic acid                      | Perfluoroalkyl carboxylic acid   | C <sub>8</sub> HF <sub>15</sub> O <sub>2</sub>                                            | 335-67-1   | 1, 4, 5, 6, 7, 8, 9                                                                                  | 2, 5, 6, 7, 8, 10 | 2, 4, 5, 6, 7, 8, 10 |
| <b>Long Chain PFAS</b>  |                                             |                                  |                                                                                           |            |                                                                                                      |                   |                      |
| PFOS                    | Perfluorooctane sulfonic acid               | Perfluoroalkane sulfonic acid    | C <sub>8</sub> HF <sub>17</sub> SO <sub>3</sub>                                           | 1763-23-1  | 1, 4, 5, 6, 7, 8, 9                                                                                  | 2, 4, 5, 7, 9     | 2, 4, 5, 6, 7, 8, 10 |
| PFHxS                   | Perfluorohexane sulfonic acid               | Perfluoroalkane sulfonic acid    | C <sub>6</sub> HF <sub>13</sub> SO <sub>3</sub>                                           | 355-46-4   | 1, 4, 5, 7, 8, 9                                                                                     | 2, 8, 10          | 2, 5, 6, 8           |
| PFNA                    | Perfluorononanoic acid                      | Perfluoroalkyl carboxylic acid   | C <sub>9</sub> HF <sub>17</sub> O <sub>2</sub>                                            | 375-95-1   | 4, 5, 7, 8                                                                                           | 2, 5, 9, 10       | 2, 5, 8              |
| PFDA                    | Perfluorodecanoic acid                      | Perfluoroalkyl carboxylic acid   | C <sub>10</sub> HF <sub>19</sub> O <sub>2</sub>                                           | 335-76-2   | 5, 8, 9                                                                                              | 2, 5, 6, 7, 9     | 2, 5, 6, 7, 8        |
| PFUnA                   | Perfluoroundecanoic acid                    | Perfluoroalkyl carboxylic acid   | C <sub>11</sub> HF <sub>21</sub> O <sub>2</sub>                                           | 2058-94-8  | 4, 5, 8                                                                                              | 5, 6, 9           | 5                    |
| PFDoA                   | Perfluorododecanoic acid                    | Perfluoroalkyl carboxylic acid   | C <sub>12</sub> HF <sub>23</sub> O <sub>2</sub>                                           | 307-55-1   |                                                                                                      | 5, 9              | 5                    |
| PFTTrDA                 | Perfluorotridecanoid acid                   | Perfluoroalkyl carboxylic acid   | C <sub>13</sub> HF <sub>25</sub> O <sub>2</sub>                                           | 72629-94-8 |                                                                                                      | 5, 9              |                      |
| PFTeDA                  | Perfluorotetradecanoic acid                 | Perfluoroalkyl carboxylic acid   | C <sub>14</sub> HF <sub>27</sub> O <sub>2</sub>                                           | 376-06-7   |                                                                                                      | 5                 |                      |
| PFOSA                   | Perfluorooctane sulfonamide                 | Perfluoroalkane sulfonamide      | C <sub>8</sub> H <sub>2</sub> F <sub>17</sub> NO <sub>2</sub> S                           | 754-91-6   |                                                                                                      |                   | 7                    |
| 8:2 FTOH                | 8:2 fluorotelomer alcohol                   | Fluorotelomer alcohol            | F(CF <sub>2</sub> ) <sub>8</sub> (CH <sub>2</sub> ) <sub>2</sub> OH                       | 678-39-7   | 1                                                                                                    | 7                 | 6, 7, 8              |
| 8:2 monoPAP             | 8:2 polyfluoroalkyl phosphate ester         | Polyfluoroalkyl phosphate ester  | F(CF <sub>2</sub> ) <sub>8</sub> (CH <sub>2</sub> ) <sub>2</sub> OP(O)OH <sub>2</sub>     | 57678-03-2 |                                                                                                      | 1                 | 8                    |
| 8:2 diPAP               | 8:2/8:2 polyfluoroalkyl phosphate ester     | Polyfluoroalkyl phosphate ester  | [F(CF <sub>2</sub> ) <sub>8</sub> (CH <sub>2</sub> ) <sub>2</sub> O] <sub>2</sub> P(O)OH  | 678-41-1   |                                                                                                      | 1                 | 8                    |
| 8:2 triPAP              | 8:2/8:2/8:2 polyfluoroalkyl phosphate ester | Polyfluoroalkyl phosphate esters | [F(CF <sub>2</sub> ) <sub>8</sub> (CH <sub>2</sub> ) <sub>2</sub> O] <sub>3</sub> P(O)    | NA         |                                                                                                      | 1                 | 8                    |
| 10:2 diPAP              | 10:2/10:2 polyfluoroalkyl phosphate ester   | Polyfluoroalkyl phosphate ester  | [F(CF <sub>2</sub> ) <sub>10</sub> (CH <sub>2</sub> ) <sub>2</sub> O] <sub>2</sub> P(O)OH | 1895-26-7  |                                                                                                      | 1                 | 8                    |
| <b>Short Chain PFAS</b> |                                             |                                  |                                                                                           |            |                                                                                                      |                   |                      |
| PFBS                    | Perfluorobutane sulfonic acid               | Perfluoroalkane sulfonic acid    | C <sub>4</sub> HF <sub>9</sub> SO <sub>3</sub>                                            | 375-73-5   | 1                                                                                                    | 2, 8, 10          | 2, 6, 7, 8           |

|                      |                                                                                        |                                 |                                                                                          |                        |   |          |      |
|----------------------|----------------------------------------------------------------------------------------|---------------------------------|------------------------------------------------------------------------------------------|------------------------|---|----------|------|
| PFHxA                | Perfluorohexanoic acid                                                                 | Perfluoroalkyl carboxylic acid  | C <sub>6</sub> HF <sub>11</sub> O <sub>2</sub>                                           | 307-24-4               | 8 | 2, 8, 10 | 2, 8 |
| PFBA                 | Perfluorobutanoic acid                                                                 | Perfluoroalkyl carboxylic acid  | C <sub>4</sub> HF <sub>7</sub> O <sub>2</sub>                                            | 375-22-4               |   | 2        | 8    |
| PFPeA                | Perfluoropentanoic acid                                                                | Perfluoroalkyl carboxylic acid  | C <sub>5</sub> HF <sub>9</sub> O <sub>2</sub>                                            | 2706-90-3              |   |          | 5    |
| PFHpA                | Perfluoroheptanoic acid                                                                | Perfluoroalkyl carboxylic acid  | C <sub>7</sub> HF <sub>13</sub> O <sub>2</sub>                                           | 375-85-9               |   |          | 8    |
| GenX (HFPO-DA); PMOH | 2,3,3,3-tetrafluoro-2-(1,1,2,2,3,3,3-heptafluoropropoxy) propanoic acid; ammonium salt | Fluorinated ether carboxylate   | C <sub>6</sub> HF <sub>11</sub> O <sub>3</sub>                                           | 13252-13-6; 62037-80-3 |   | 8        | 2, 8 |
| PMPP/ADONA           | 3H-perfluoro-3-[(3-methoxypropoxy) propanoic acid, ammonium salt                       | Fluorinated ether carboxylate   | C <sub>7</sub> H <sub>5</sub> F <sub>12</sub> NO <sub>4</sub>                            | 958445-44-8            |   |          | 8    |
| 4:2 FTOH             | 4:2 fluorotelomer alcohol                                                              | Fluorotelomer alcohol           | F(CF <sub>2</sub> ) <sub>4</sub> (CH <sub>2</sub> ) <sub>2</sub> OH                      | 2043-47-2              | 1 | 1        | 8    |
| 6:2 FTOH             | 6:2 fluorotelomer alcohol                                                              | Fluorotelomer alcohol           | F(CF <sub>2</sub> ) <sub>6</sub> (CH <sub>2</sub> ) <sub>2</sub> OH                      | 647-42-7               | 1 | 1        | 8    |
| 4:2 diPAP            | 4:2/4:2 polyfluoroalkyl phosphate ester                                                | Polyfluoroalkyl phosphate ester | [F(CF <sub>2</sub> ) <sub>4</sub> (CH <sub>2</sub> ) <sub>2</sub> O] <sub>2</sub> P(O)OH | 135098-69-0            |   | 1        |      |
| 6:2 diPAP            | 6:2/6:2 polyfluoroalkyl phosphate ester                                                | Polyfluoroalkyl phosphate ester | [F(CF <sub>2</sub> ) <sub>6</sub> (CH <sub>2</sub> ) <sub>2</sub> O] <sub>2</sub> P(O)OH | 57677-95-9             |   | 1        |      |
